# Supplementary material for: Trypanocidal and Anti-Inflammatory Effects of Three ent-Kaurane Diterpenoids from Gymnocoronis spilanthoides var. subcordata (Asteraceae)
Source: MDPI journal article supplement (doi:10.3390/pharmaceutics16030415), 2024-03-18
Supplement: s1 [file s1]

# Trypanocidal and immunomodulatory effects of diterpenoids from *Gymnocoronis spilanthoides* var. *subcordata* (Asteraceae)

Mariana G. Selener<sup>1,2,ψ</sup>, Jimena Borgo<sup>1,2,ψ</sup>, Maria Belen Sarratea<sup>3,ψ</sup>, Maria Alicia Delfino<sup>4</sup>, Laura C. Laurella<sup>1,2</sup>, Natacha Cerny<sup>5</sup>, , Jessica Gomez<sup>6</sup>, Mauro Coll<sup>6</sup>, Emilio L. Malchiodi<sup>3,4</sup>, Augusto E. Bivona<sup>3,4</sup>, Patricia Barrera<sup>6</sup>, Flavia C. Redko<sup>1,2</sup>, César A. N. Catalán<sup>7</sup>, Andrés Sánchez Alberti<sup>3,5,†,\*</sup> and Valeria P. Sulsen<sup>1,2,†,\*</sup>

<sup>1</sup> Universidad de Buenos Aires, Facultad de Farmacia y Bioquímica, Cátedra de Farmacognosia, Junín 956, piso 2, Buenos Aires C1113AAD, Argentina.

<sup>2</sup> CONICET-Universidad de Buenos Aires, Instituto de Química y Metabolismo del Fármaco (IQUIMEFA), Junín 956, piso 2, Buenos Aires C1113AAD, Argentina.

<sup>3</sup> CONICET-Universidad de Buenos Aires, Instituto de Estudios de la Inmunidad Humoral (IDEHU), Junín 956, piso 4, Buenos Aires C1113AAD, Argentina.

<sup>4</sup> Universidad de Buenos Aires, Facultad de Farmacia y Bioquímica, Cátedra de Inmunología, Junín 956, piso 4, Buenos Aires C1113AAD, Argentina Buenos Aires, Argentina.

<sup>5</sup> Universidad de Buenos Aires, Facultad de Medicina, Departamento de Microbiología, Parasitología e Inmunología-IMPAM (UBA-CONICET), Paraguay 2155, C1121ABG Buenos Aires, Argentina.

<sup>6</sup> Facultad de Ciencias Médicas, Instituto de Histología y Embriología "Dr. Mario H. Burgos" (IHEM), Universidad Nacional de Cuyo-CONICET, CC 56, Mendoza 5500, Argentina.

<sup>7</sup> Universidad Nacional de Tucumán, Facultad de Bioquímica, Química y Farmacia, Instituto de Química Orgánica, Ayacucho 471, (T4000INI), San Miguel de Tucumán, Tucumán, Argentina.

ψ These authors contributed equally to this work.

† The work was co-directed by both authors.

\* Correspondence: [vsulsen@ffyb.uba.ar](mailto:vsulsen@ffyb.uba.ar) ; Tel.: +54 (011) 5287-4272 and [aalberti@ffyb.uba.ar](mailto:aalberti@ffyb.uba.ar) Tel.: +54 (011) 528-53525.

## Supplementary material

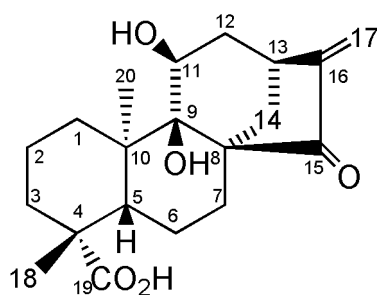

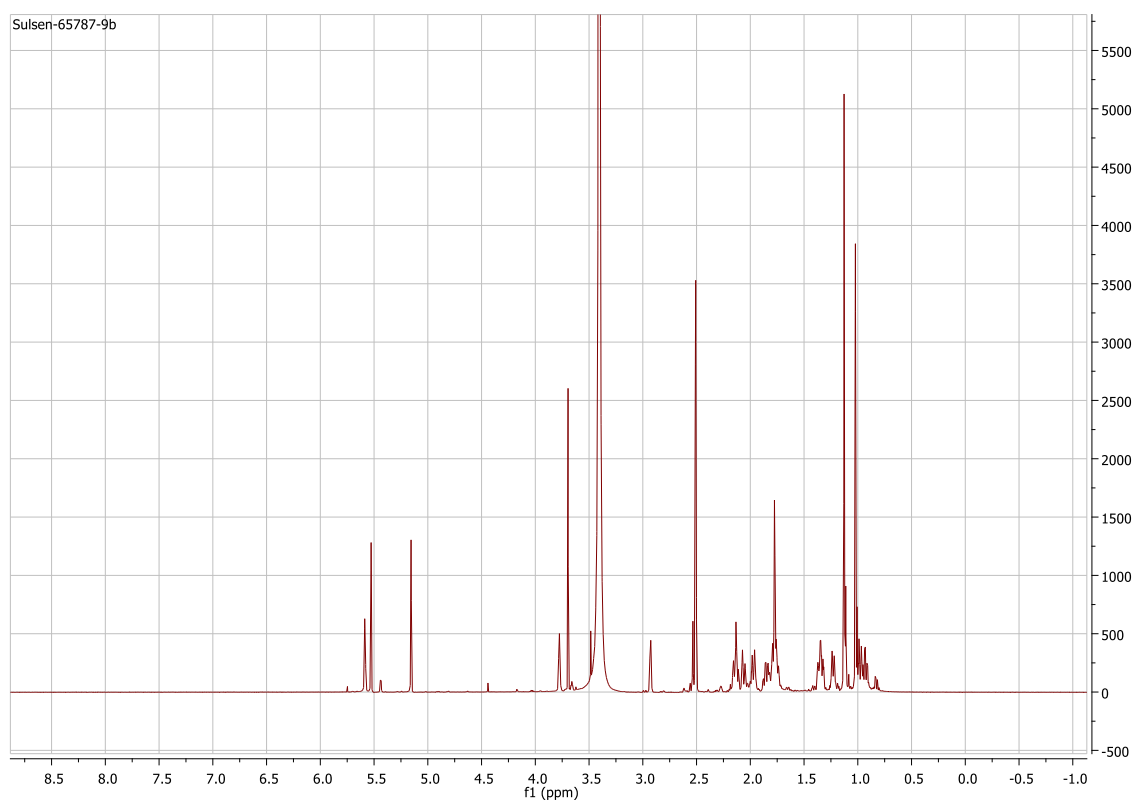

**Figure S1.**  $^1\text{H}$ -NMR spectrum of compound 1

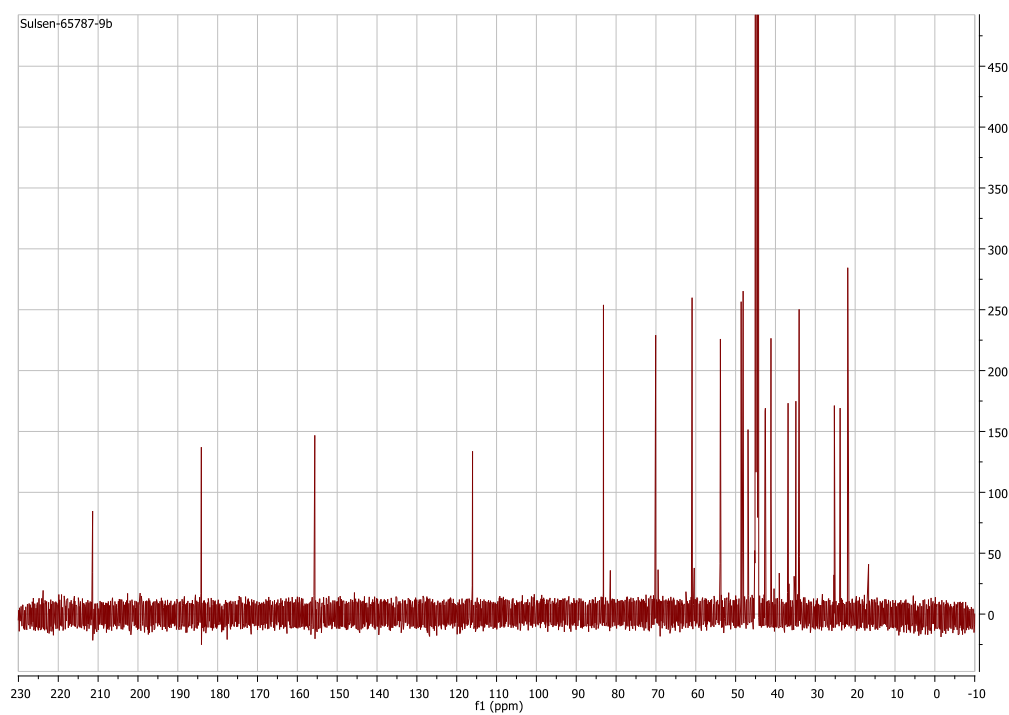

**Figure S2.**  $^{13}\text{C}$ -NMR spectrum of compound 1

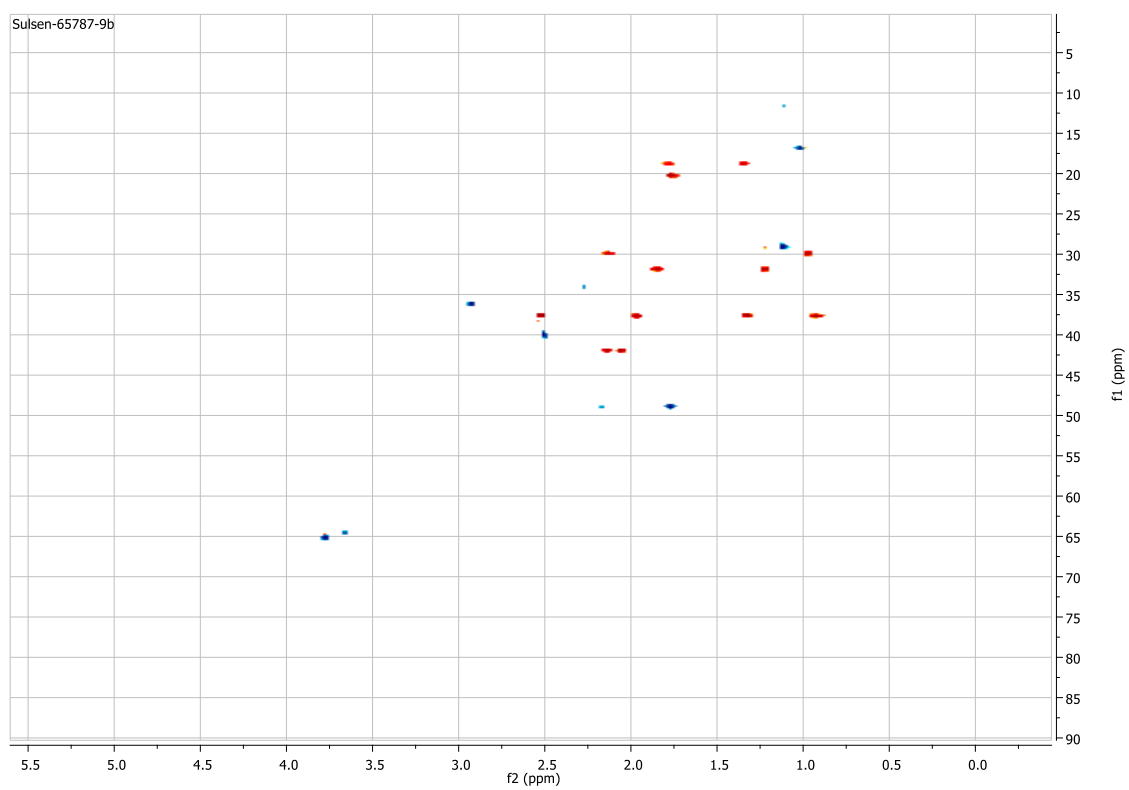

**Figure S3.** HSQC spectrum of compound **1**

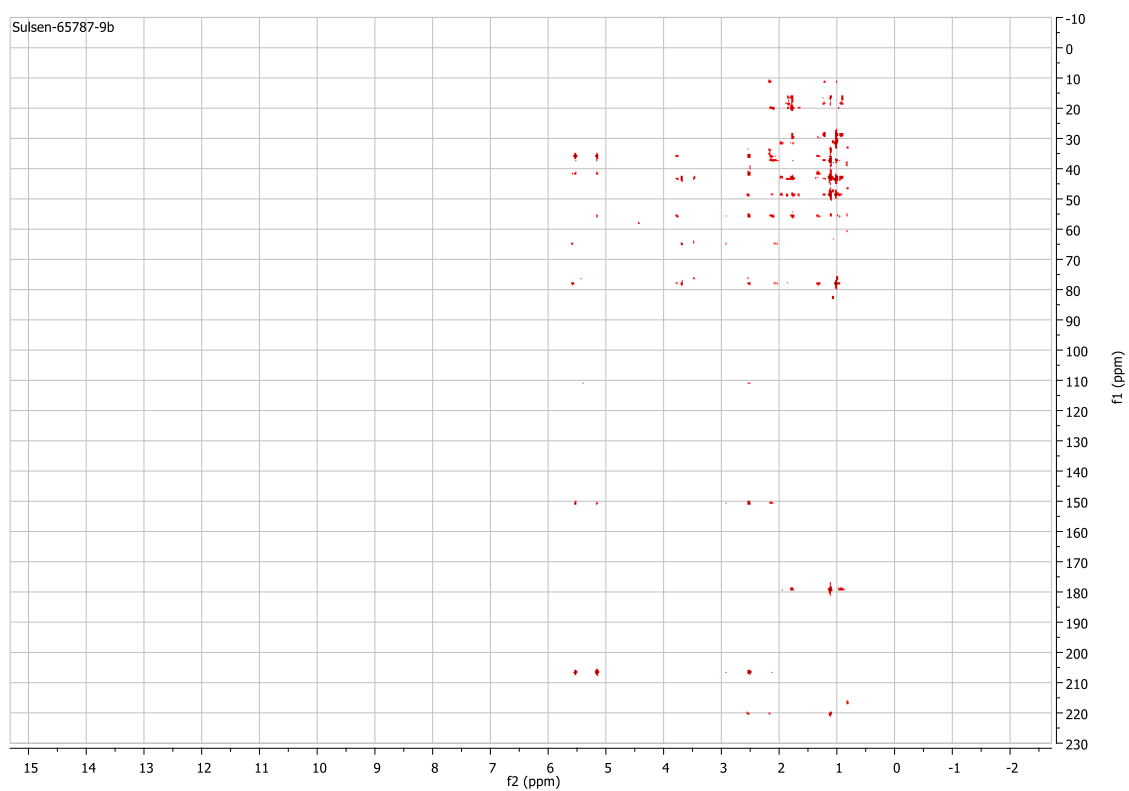

**Figure S4.** HMBC spectrum of compound **1**

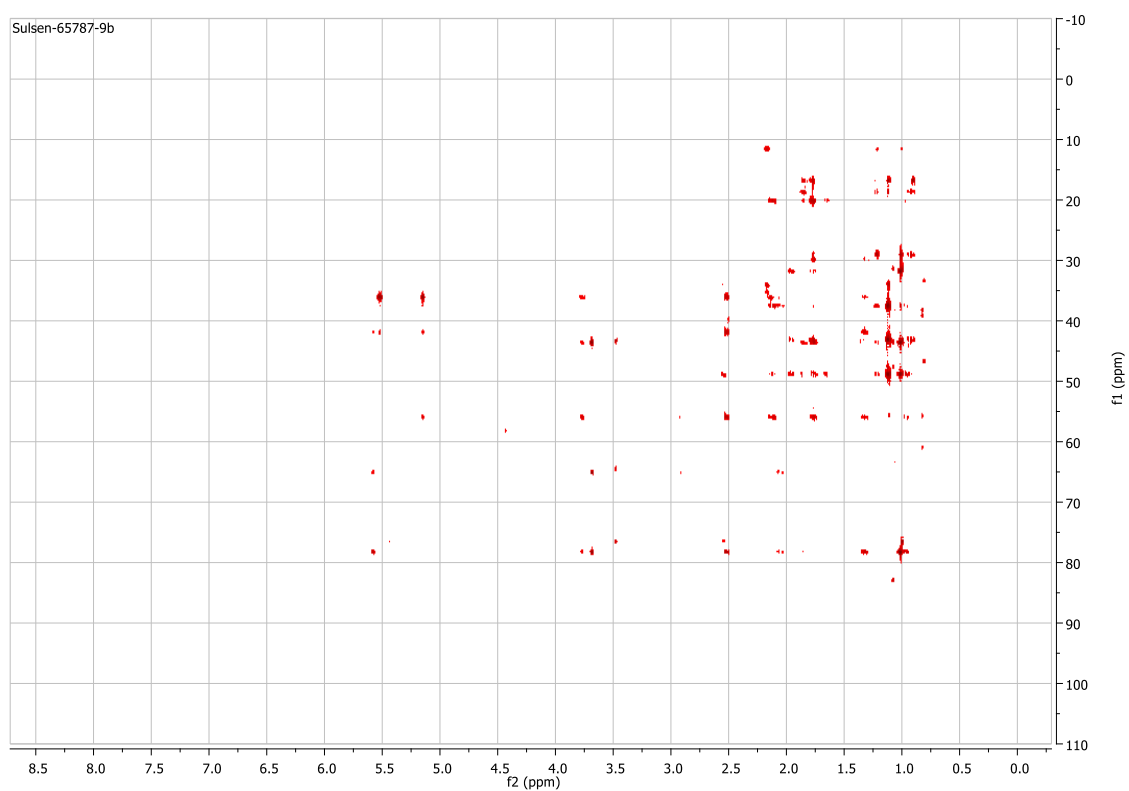

**Figure S5.** HMBC spectrum of compound **1**

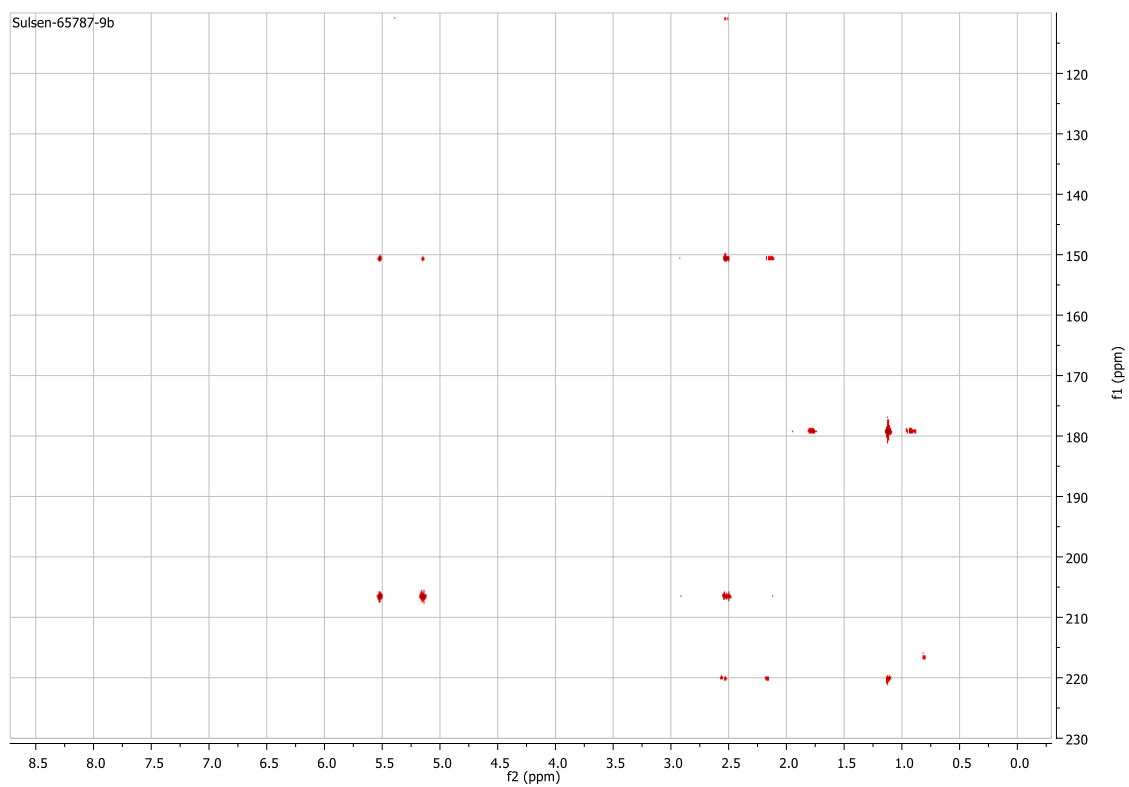

**Figure S6.** HMBC spectrum of compound **1**

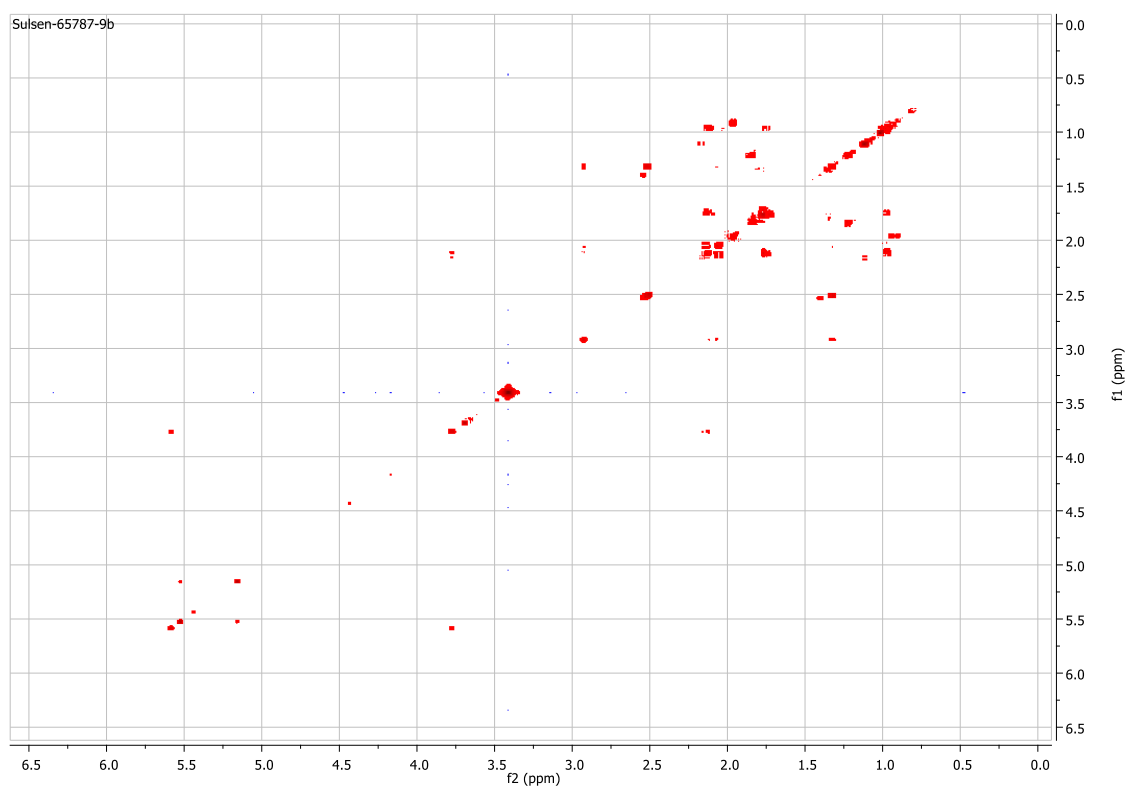

**Figure S7.**  $^1\text{H}$ - $^1\text{H}$  COSY spectrum of compound **1**

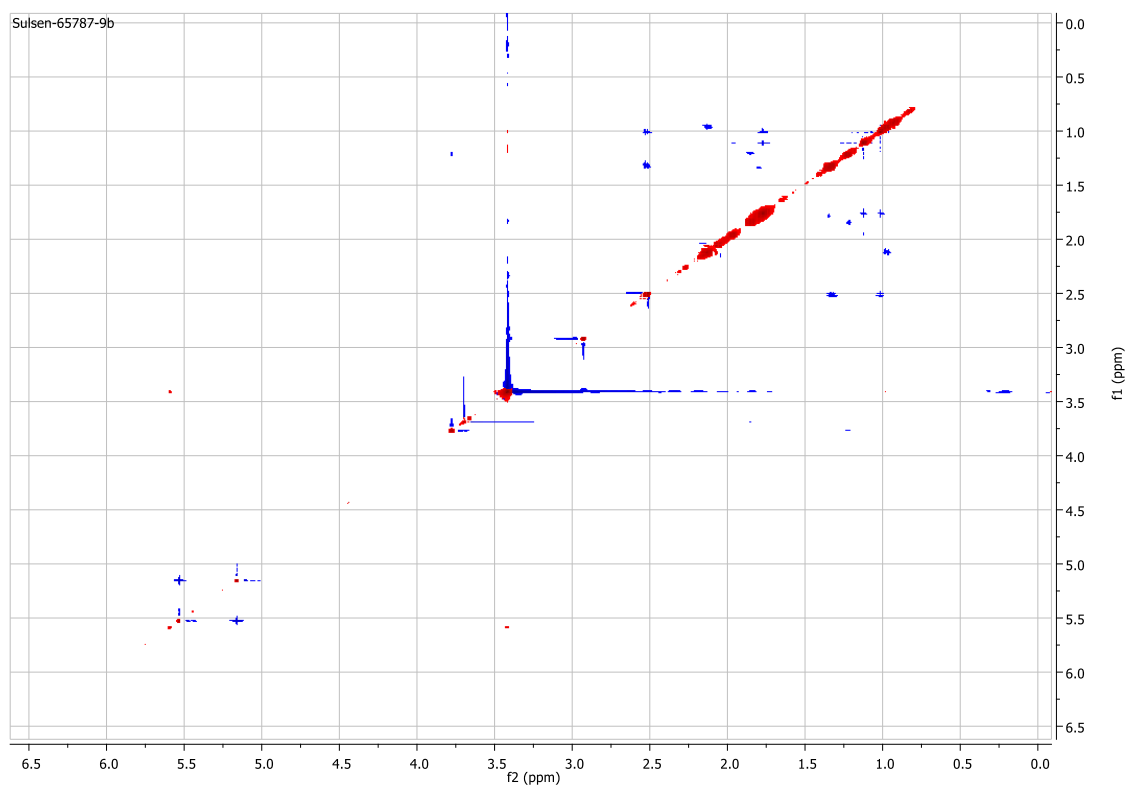

**Figure S8.** NOESY spectrum of compound **1**

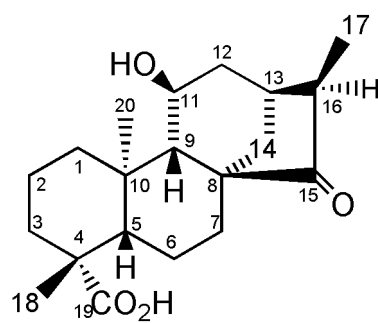

**Compound 2**

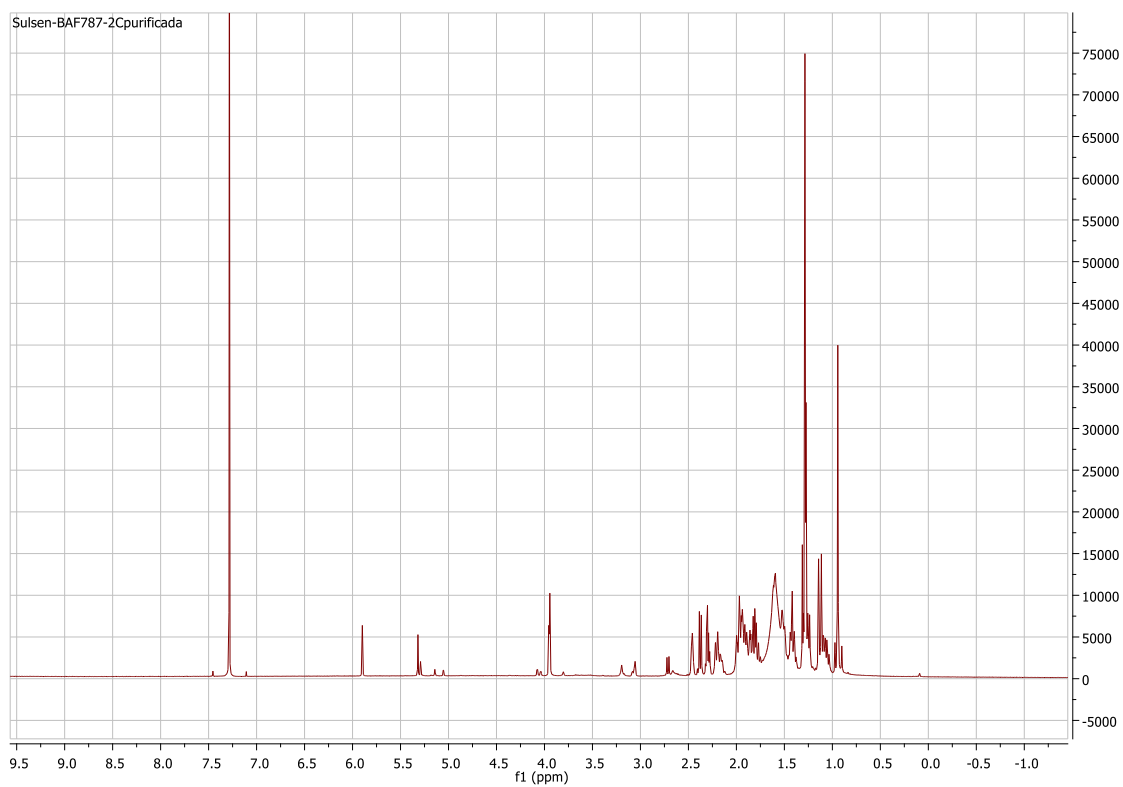

**Figure S9.** <sup>1</sup>H-NMR spectrum of compound 2

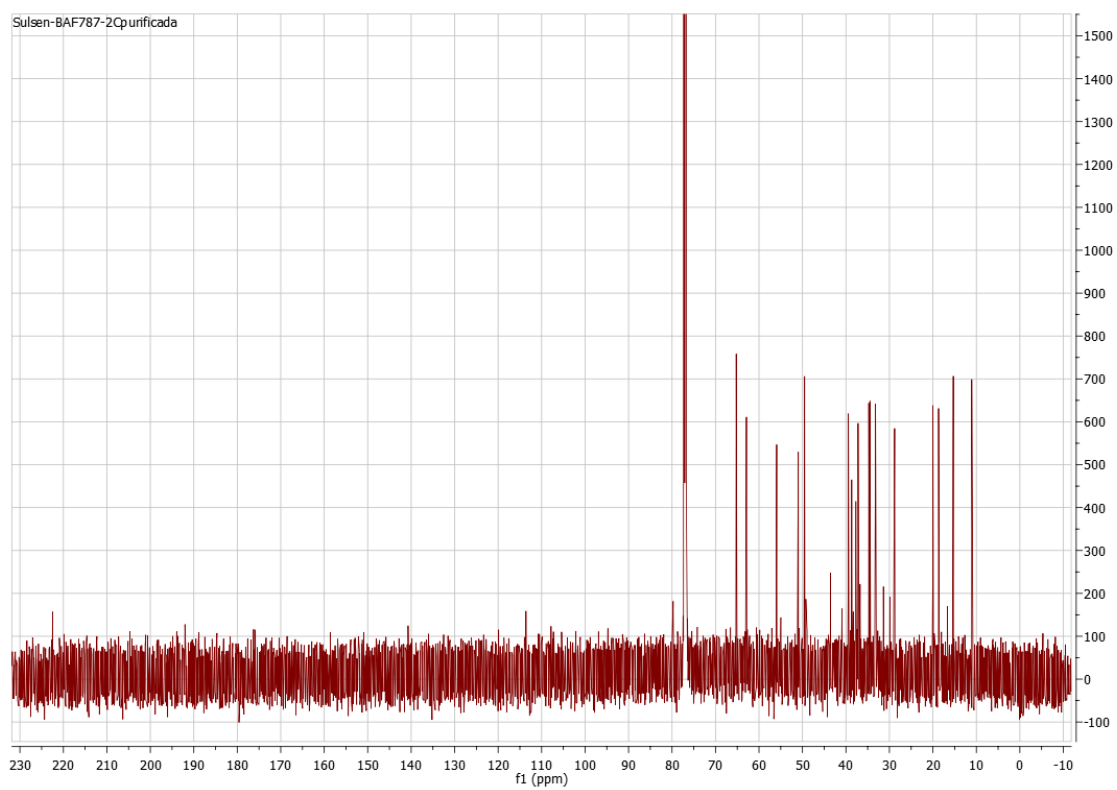

**Figure S10.**  $^{13}\text{C}$ -NMR spectrum of compound 2

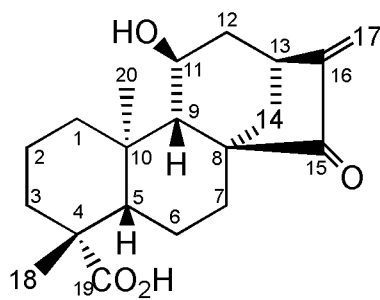

**Compound 3**

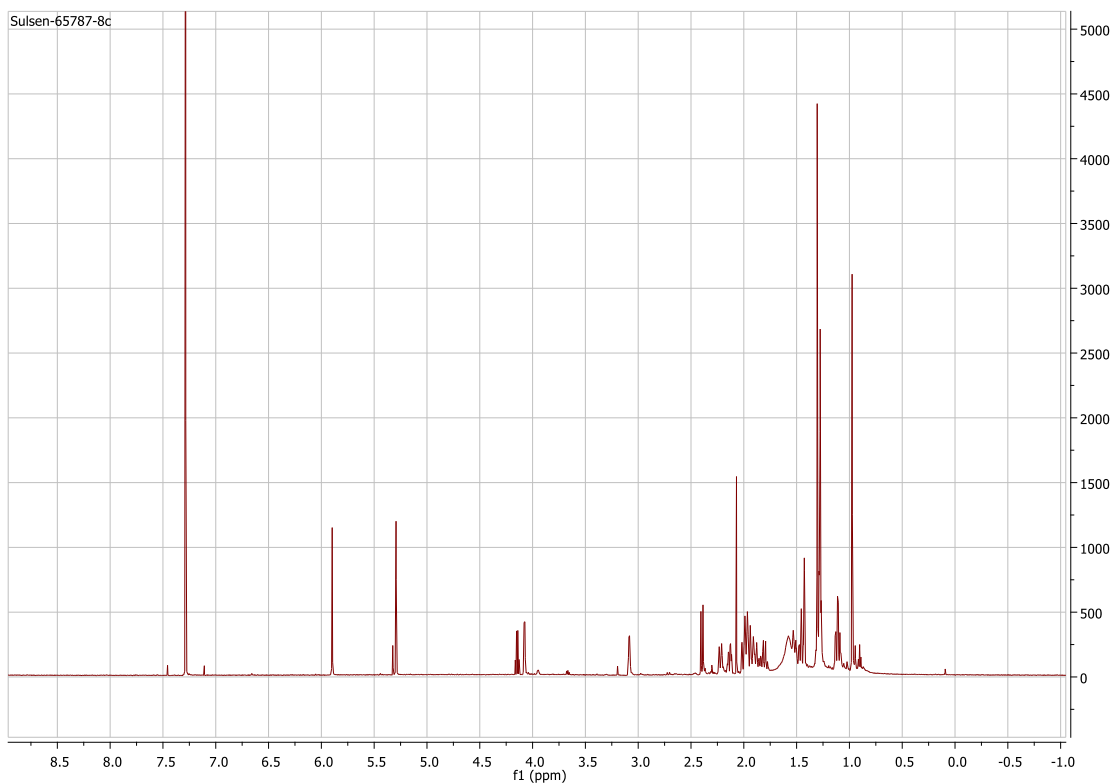

**Figure S11.** <sup>1</sup>H-NMR spectrum of compound 3

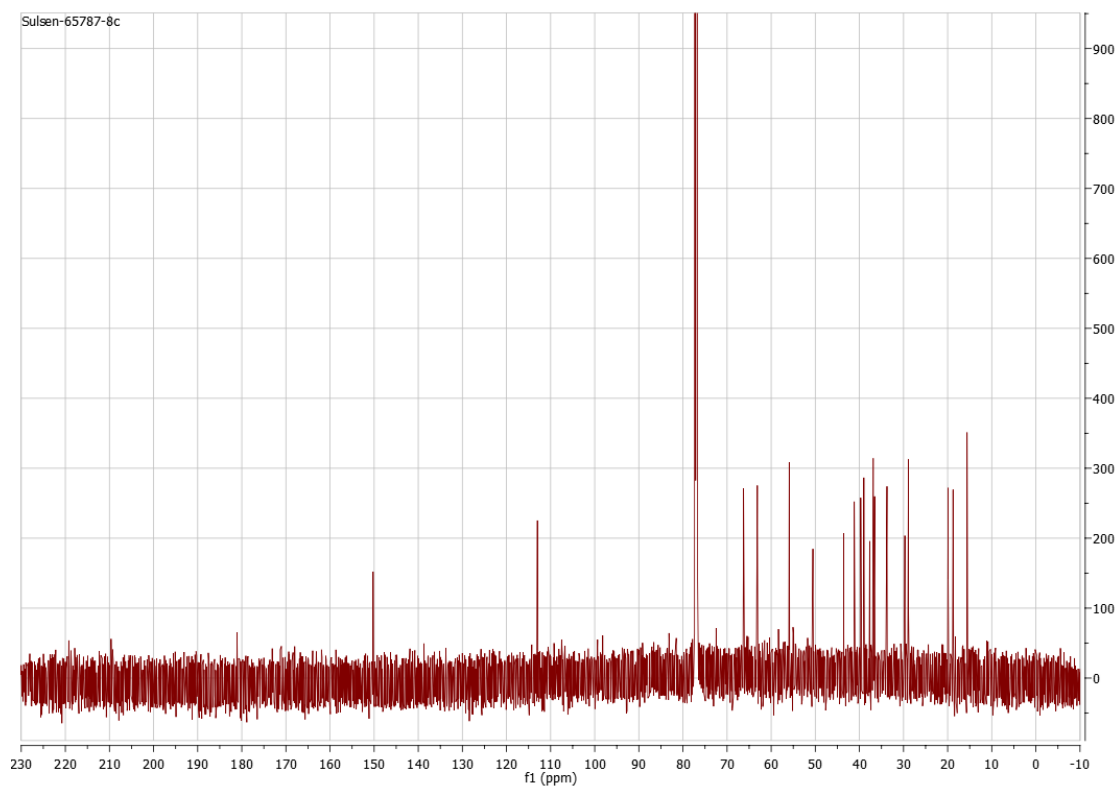

**Figure S12.** <sup>13</sup>C-NMR spectrum of compound 3



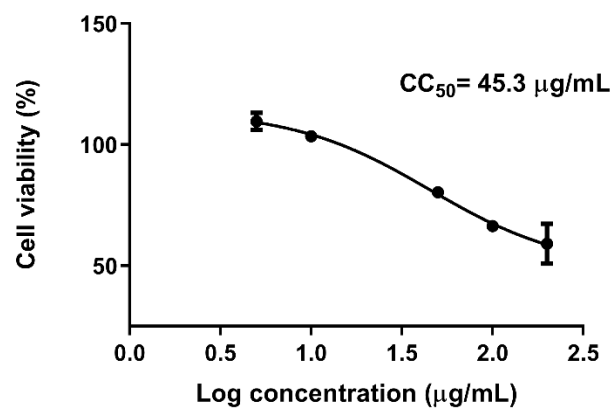

**Figure S13.** Cytotoxicity of benznidazole on murine splenocytes.
